# Supplementary material for: Intake of Low Glycaemic Index Foods but Not Probiotics Is Associated with Atherosclerosis Risk in Women with Polycystic Ovary Syndrome
Source: MDPI journal article supplement (doi:10.3390/life13030799), 2023-03-15
Supplement: s1 [file s1]

**Supplement Table S1:** Anthropometric measurements characteristics of the study group.

| Characteristics                             | Low AIP |    | High AIP |    | P       |
|---------------------------------------------|---------|----|----------|----|---------|
|                                             | n       | %  | n        | %  |         |
| BMI                                         |         |    |          |    |         |
| < 25 kg/m <sup>2</sup> normal               | 49      | 72 | 21       | 36 | < 0.00* |
| ≥ 25 kg/m <sup>2</sup> overweight and obese | 19      | 28 | 38       | 64 |         |
| Waist circumference                         |         |    |          |    |         |
| < 80 cm low risk                            | 43      | 63 | 19       | 32 | < 0.00* |
| ≥ 80 cm at risk                             | 25      | 37 | 40       | 68 |         |
| WHR (-)                                     |         |    |          |    |         |
| < 0.85 gynoid                               | 55      | 80 | 36       | 61 | 0.04*   |
| ≥ 0.85 android                              | 13      | 20 | 23       | 39 |         |

\*p< 0.05. Values were calculated with the chi2 test.

**Supplement Table S2:** Odds ratios (O.R.s with 95% confidence interval (95% CI)) of the high atherogenic index of plasma according to the diet quality indexes.

| Food indexes                                                   | Atherogenic Index of Plasma ≥ 0.11 |                              |                                      |
|----------------------------------------------------------------|------------------------------------|------------------------------|--------------------------------------|
|                                                                | Occurrence (%) / N                 | Crude OR (CI 95%)            | OR adjusted for BMI and age (CI 95%) |
| ProDI-4 probiotic diet index <sup>1</sup> ≥ upper quartile     | (16.54)/21                         | 1.08 (0.51; 2.26); p = 0.83  | 1.10 (0.49; 2.49); p = 0.81          |
| LGIDI-4 low glycaemic diet index <sup>2</sup> ≥ upper quartile | (26.77)/10                         | 0.37 (0.16; 0.88); p = 0.02* | 0.32 (0.12; 0.85); p = 0.02*         |
| pHDI-10 <sup>3</sup> pro-healthy diet index ≥ upper quartile   | (8.66)/11                          | 0.51 (0.22; 1.19); p = 0.11  | 0.43 (0.17; 1.13); p = 0.08          |
| nHDI-14 <sup>4</sup> non-healthy diet index ≥ upper quartile   | (10.24)/13                         | 0.78 (0.34; 1.79); p = 0.56  | 1.39 (0.55; 3.52); p = 0.48          |

<sup>1</sup> probiotic food group: Fermented milk drinks, Tinned vegetables, Fresh cheese curd products, cheese;

<sup>2</sup> low glycaemic food groups: wholemeal bread, buckwheat, oats, whole-grain pasta or other coarse-ground groats, legumes-based foods, and vegetables; <sup>3</sup> pro-healthy dietary index [34]; <sup>4</sup> non-healthy dietary index [34]; The p values below the threshold of statistical significance are marked with the \*p<

0.05

T
